# Supplementary material for: Fucosylated Proteome Profiling Identifies a Fucosylated, Non-Ribosomal, Stress-Responsive Species of Ribosomal Protein S3
Source: MDPI journal article supplement (doi:10.3390/cells10061310), 2021-05-25
Supplement: s1 [file s1]

Supplementary Figures

| <u>Annotation</u><br><u>Cluster 1</u> | <u>Enrichment Score</u><br><u>21.21</u>                                       | <u># of</u><br><u>proteins</u> | <u>P value</u> | <u>Benjamini</u> |
|---------------------------------------|-------------------------------------------------------------------------------|--------------------------------|----------------|------------------|
| GOTERM_BP_DIRECT                      | translational initiation                                                      | 30                             | 2.40E-30       | 2.40E-27         |
| GOTERM_BP_DIRECT                      | SRP-dependent<br>cotranslational protein<br>targeting to membrane             | 26                             | 5.70E-29       | 2.80E-26         |
| GOTERM_BP_DIRECT                      | nuclear-transcribed<br>mRNA catabolic<br>process, nonsense-<br>mediated decay | 26                             | 3.70E-26       | 1.20E-23         |
| GOTERM_BP_DIRECT                      | viral transcription                                                           | 24                             | 6.90E-24       | 1.70E-21         |
| UP_KEYWORDS                           | Ribosomal protein                                                             | 24                             | 2.10E-20       | 6.00E-19         |
| GOTERM_BP_DIRECT                      | rRNA processing                                                               | 26                             | 1.30E-19       | 2.60E-17         |
| GOTERM_MF_DIRECT                      | structural constituent<br>of ribosome                                         | 25                             | 7.00E-18       | 4.90E-16         |
| GOTERM_BP_DIRECT                      | translation                                                                   | 26                             | 7.70E-18       | 1.30E-15         |
| KEGG_PATHWAY                          | Ribosome                                                                      | 24                             | 1.10E-17       | 1.30E-15         |
| GOTERM_CC_DIRECT                      | ribosome                                                                      | 21                             | 1.30E-16       | 3.70E-15         |

**Figure S1.** Gene Ontology analysis highlights proteins involved in translation as over-represented in UEAI-recognized fucosylated proteins. Proteins with  $\geq 5$  exclusive unique spectra count (EUSC) were analyzed using DAVID Bioinformatics Database Functional Annotation tool using default settings.

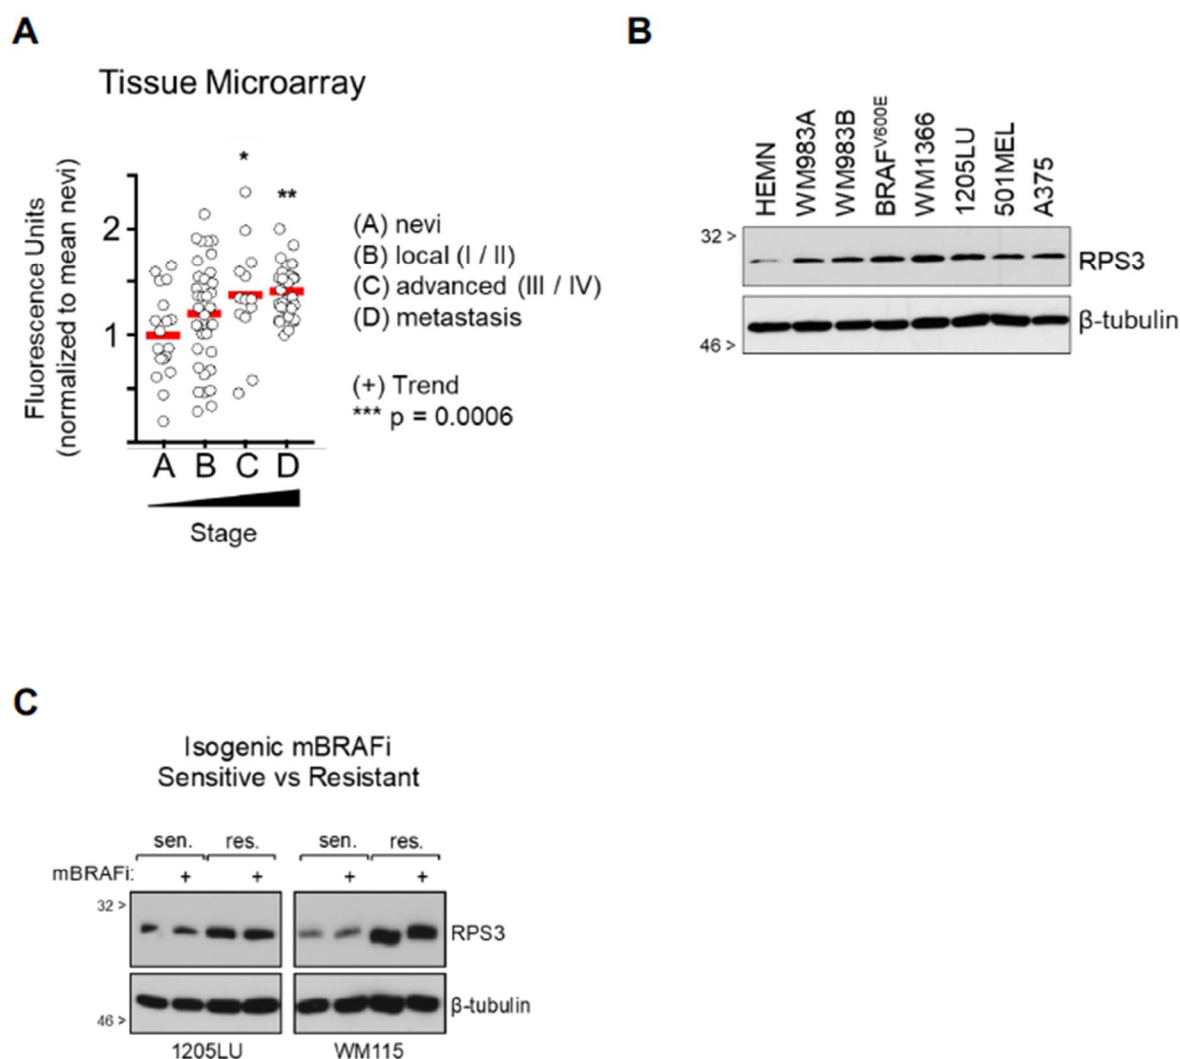

**Figure S2.** High RPS3 is associated with advanced disease, poorer overall survival, and drug resistance in melanoma samples. **(A)** Melanoma tissue microarray containing nevi, Stage I, II, III, IV, and metastatic samples stained for RPS3. Specimens were divided into four groups: nevi (benign), local (Stage I/II), advanced (Stage III/IV), and metastatic (direct sample of a metastatic growth). Data are normalized to mean nevi signal. Red bar represents the mean for each group. Data was analyzed by 2-way ANOVA. **(B)** The Cancer Genome Atlas (TCGA) melanoma dataset was accessed through cBioPortal.org. RPS3 mRNA level was binned by z-Score: < -1, -1 to 0, 0 to 1, 1 to 2, and >2. The overall survival (OS) was plotted against the corresponding mRNA datapoint to analyze the relationship between survival and RPS3 expression. Red bar represents the mean for each group. Data was analyzed by 2-way ANOVA. **(C)** Primary human epidermal melanocytes (HEMN) and a panel of melanoma cell lines (all other cells shown) analyzed for RPS3 protein level by Western blot. **(D)** Isogenic mutant BRAF inhibitor (mBRAFi, PLX4032, 1  $\mu$ M) sensitive and resistant cell lines were grown either 3 days off drug or 2 days on drug to assess RPS3 protein level.

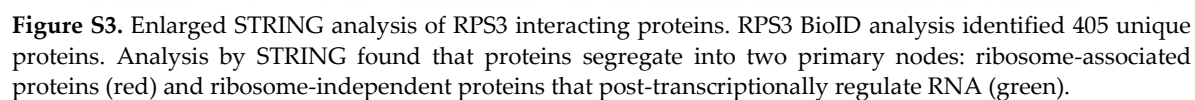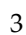



**Figure S4.** Fucosylated RPS3 interacts with HNRNPU in an RNA-dependent manner. (A) Primary human epidermal melanocytes (HEMN) and a panel of melanoma cell lines (all other cells shown) grown and harvested for nuclear (N) and cytoplasmic (C) fractions. Lysates were analyzed for protein level and localization of HNRNPU and BCLAF1. (B) Cells were grown on glass coverslips and fixed for visualization of HNRNPU and BCLAF1 (green). Cells were counterstained with DAPI to visualize the nuclear region. HNRNPU could be seen in both the extra-nuclear and nuclear space, whereas BCLAF1 was found only in the nuclear region. IF staining with no primary antibody (No 1°) was run as a negative control. (C) and (D) Cells expressing myc-DDK (FLAG) tagged RPS3 (RPS3-mDDK) were lysed and subsequently subjected to FLAG IP. RPS3 and associated proteins were then eluted and subjected to UEA1-PD to isolate proteins associated with fucosylated RPS3. Fucosylated RPS3 was found to co-IP HNRNPU, confirming interaction. (E) RPS3 and HNRNPU interaction was tested for dependence on the presence of RNA. Cell lysates were incubated with RNase A for 1h prior to IP. Lysates were subjected to HNRNPU IP and subsequently analyzed for co-IP of RPS3.

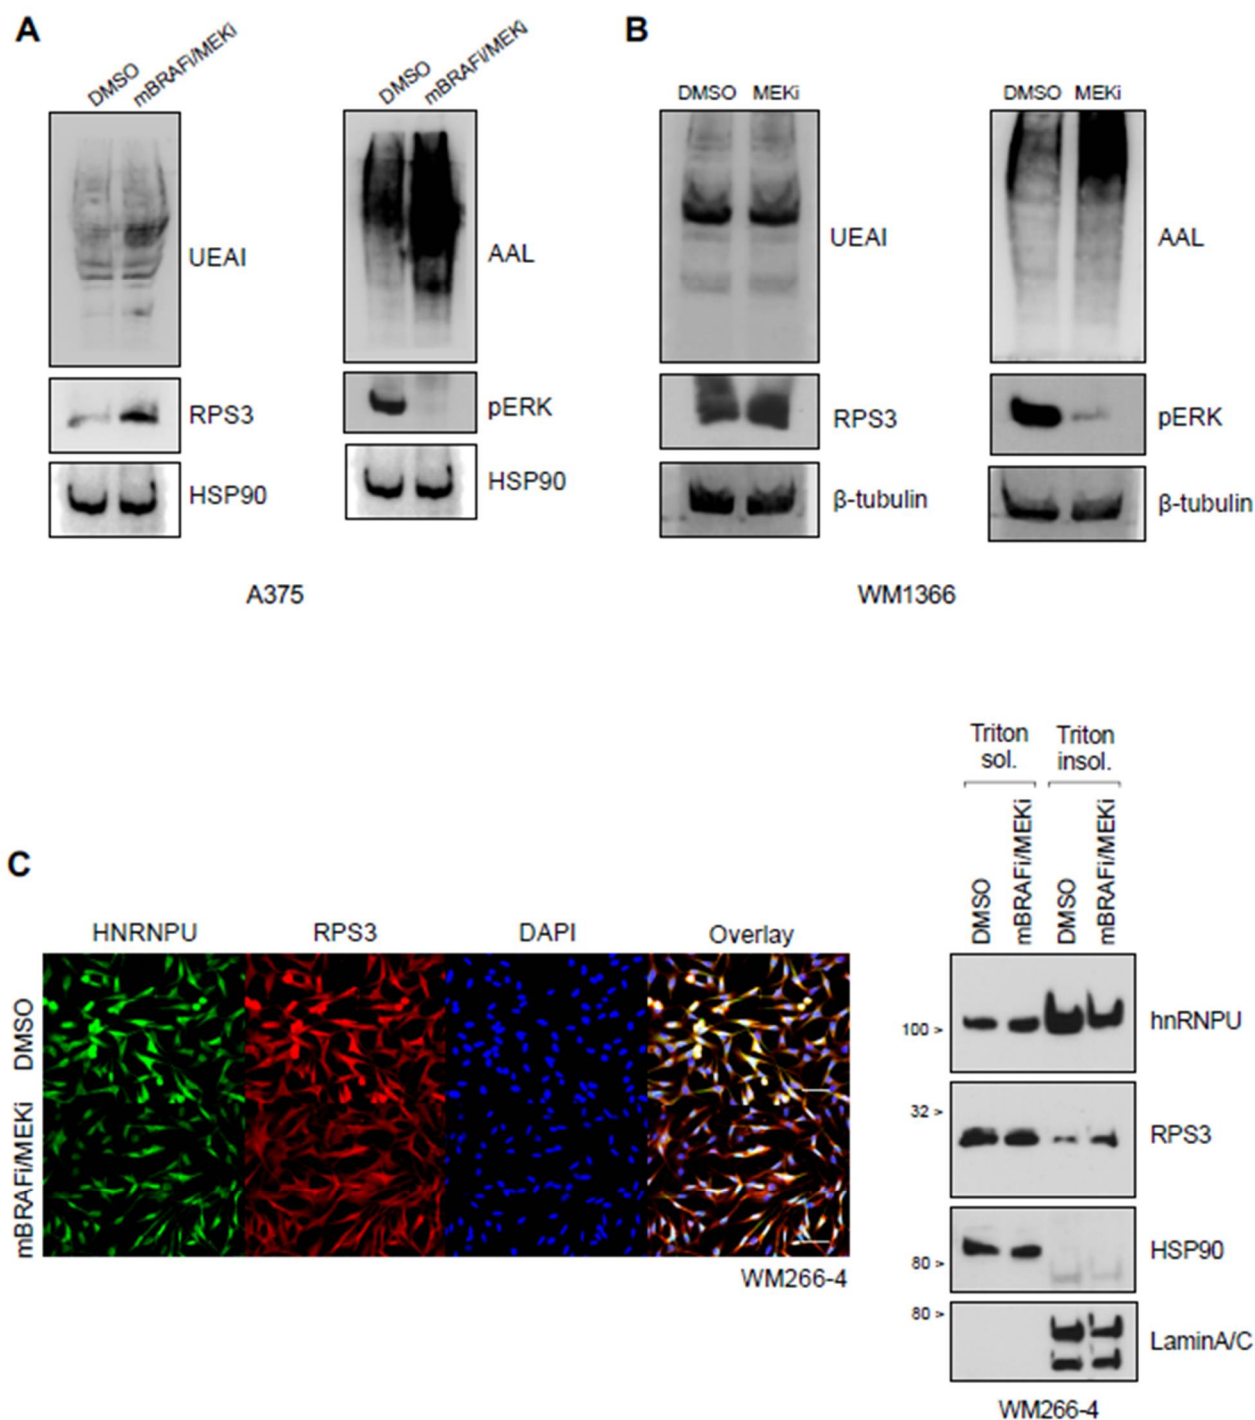

**Figure S5.** MAP kinase inhibitor treatment does not affect global UEAI levels, or RPS3 or HNRNPU localization. (A) Mutant BRAF cells were treated with combination mutant-BRAF inhibitor (mBRAFi, PLX4032, 1  $\mu$ M) and MEK inhibitor (MEKi, trametinib, 10 nM) for 2 d prior to harvest for analysis of global UEAI protein level. AAL was probed to determine any effect of global golgi-dependent fucosylation level. pERK was probed to confirm MAPK pathway inhibition. (B) NRAS-mutant cells were treated with MEKi (10 nM) for 2 d prior harvest for analysis of global UEAI protein level. AAL was probed to determine any effect of global golgi-dependent fucosylation level. pERK was probed to confirm MAPK pathway inhibition. (C) BRAF-mutant cells were grown on glass coverslips and treated with combination mBRAFi (1 $\mu$ M) and MEKi (10 nM) for 2 d prior to analysis for RPS3 (red) and HNRNPU (green) localization. Cells were counterstained with DAPI nuclear stain. Cells were similarly treated for analysis of RPS3 and HNRNPU location by fractionation.

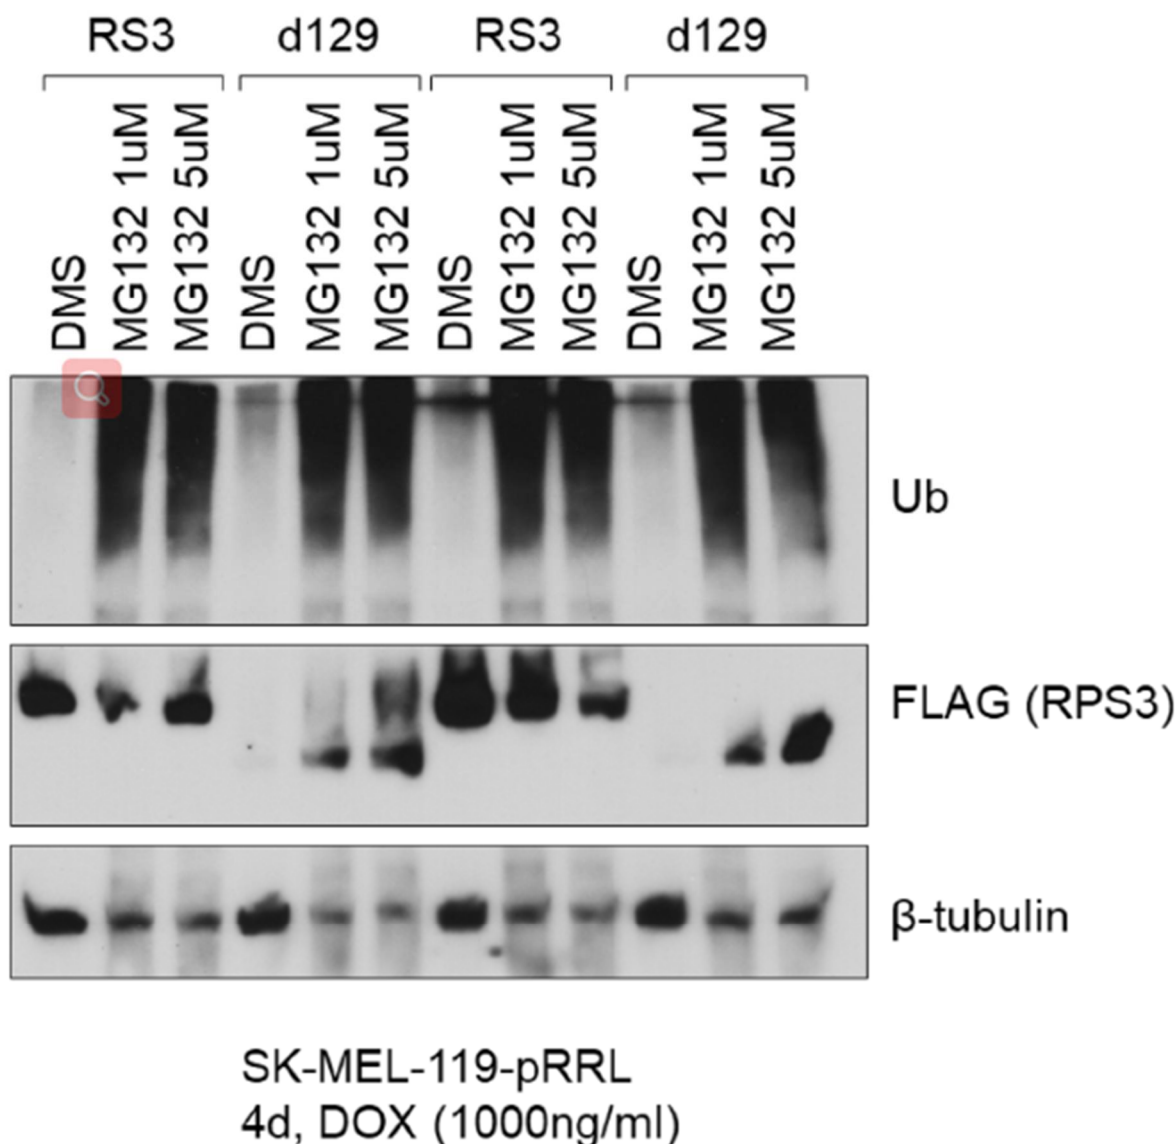

**Figure S6.** RPS3 fucosylation mutant shows decreased stability and is rapidly degraded. Cells transduced with lentivirus containing DOX inducible EGFP, RPS3-mDDK or RPS3- $\Delta$ 129-160-mDDK ( $\Delta$ 129). Cells were treated with DOX at 1000 ng/mL for 4 d. On the third day of DOX treatment, cells were put on MG132 at 1 and 5  $\mu$ M and incubated overnight. Cells were then harvested for analysis by Western blot.
